# Supplementary material
Source: PubMed Central journal article supplement (PMC1364536)
Supplement: NIHMS4960-supplement-sup1.pdf [file NIHMS4960-supplement-sup1.pdf]

# nature

ULRIKE HEBERLEIN  
ROCK HALL, RM. 448F  
UCSF, MISSION BAY CAMPUS  
1550 4<sup>th</sup> Street  
SAN FRANCISCO, CA 94143-2822  
(for express mail use zip  
code 94158)

Corresponding Author Name and Address:

Nature Manuscript Reference Number:

2003-12-135228C

COLOUR FIGURES IN *NATURE*

With the rising demand for colour illustrations and the increasing cost of reproducing them, *Nature* has been forced to adopt the policy of many other journals in asking authors to contribute towards the cost of colour reproduction. Our current charge is £700 for the first colour figure and £250 for each additional figure.

Each paper will be assessed individually following publication, when you will be billed. If you are unable to meet the costs your bill will be waived, provided we agree that colour is essential and you explain the circumstances before your paper is published.

PLEASE COMPLETE AND SIGN THE SECTION BELOW, DELETING WHICHEVER ALTERNATIVE DOES NOT APPLY, AND RETURN A COPY OF THIS SHEET TO *NATURE*.

I agree to pay the sum requested by *Nature* in the event that colour is considered essential.

I am unable to meet the costs of colour for the following reason:

Signed:



Name in block letters:

ULRIKE HEBERLEIN

**Declaration of competing financial interests**

JOURNAL: NATURE

MANUSCRIPT TITLE: The hangover gene defines a stress pathway required for ethanol tolerance development.

MANUSCRIPT NUMBER:

2003-12-135228C

Please check one of the following:

1. I declare that the authors have no competing interests such as those defined above or others that might be perceived to influence the results and discussion reported in this paper.
2. The authors have competing interests such as those defined above or others that might be perceived to influence the results and discussion reported in this paper.
3. I decline to respond to this request for information.

If you have checked 2, please specify the competing interests:

In reports of research, under a heading "Competing interests", we will publish "Authors declare competing financial interests: see Web version for details", "Authors declare they have no competing financial interests" or "Authors decline to provide information about competing financial interests"

SIGNATURE: 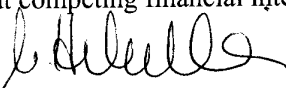

NAME IN BLOCK CAPITALS: ULRIKE HEBERLEIN

DATE: 5/17/05

# nature

## MANUSCRIPT CHECKLIST

The following checklist is intended to aid the publication of your manuscript. Please read through the list carefully and amend your manuscript as appropriate. To avoid delays in the production process, please complete and return this sheet with the final version of your manuscript.

Text

Letters to Nature

Articles

All manuscripts

For TeX users

## Artwork

*Nature* will edit figures to conform to house style and for clear reproduction in print. If necessary, figures will be resized to fit single (86 mm) or double (178 mm) column width. Please check the following points when preparing your figures.

### Electronic figure formats

- Preferred file formats for line artwork and graphs are eps, postscript, pdf and Illustrator
- Preferred file formats for photographic images are TIFF and Photoshop
- For a full list of acceptable electronic formats, see <http://www.nature.com/nature/submit/finalsubmission/figure/>

### When preparing and sending figures

- Text in an editable format and in sans serif font (Helvetica, Arial)
- Text and lines clearly visible when figure is sized for page: type size 6–8 point; lines preferably 0.5 point (0.18 mm)
- Colour images in CMYK (not RGB) mode
- All artwork on disk (floppy, CD-ROM, Zip)
- Good-quality hard copies of all figures supplied
- Suggestions for cover artwork submitted on separate disk and provided as hard copy
- Completed colour costs form submitted with manuscript (<http://www.nature.com/nature/submit/finalsubmission/figure/COLFIGS.pdf>)
- For reviews/Insight articles, permission obtained for any republished or redrawn illustrations

See <http://www.nature.com/nature/submit/finalsubmission/figure/> for detailed guidelines. For further help and advice, e-mail our art editors at [art@nature.com](mailto:art@nature.com) with the words 'Nature figures' in the subject line.

## Supplementary Information

*Nature* does not edit online-only material. Please check the following points when preparing Supplementary Information for publication:

- Supplementary Information referred to in main text (print version) of paper
- Separate text file provided with a brief description (file format and content) of each item of Supplementary Information
- Hard copies provided for all items
- Disks labelled with file names and formats and manuscript reference number

See <http://www.nature.com/nature/submit/finalsubmission/SI/> or e-mail [online-editor@nature.com](mailto:online-editor@nature.com) for guidelines and advice on preparing Supplementary Information.

Please e-mail [authors@nature.com](mailto:authors@nature.com) if you have any additional queries.
