# Supplementary material
Source: PubMed Central journal article supplement (PMC1364536)
Supplement: NIHMS4960-supplement-sup2.pdf [file NIHMS4960-supplement-sup2.pdf]

# ACCEPT - BIOLOGY

AUTHOR: HEBERLEIN  
MS NUMBER: 2003-12-13522B  
TITLE: The hangover gene defines a stress pathway required for ethanol tolerance development

EDITOR: TC  
RECEIVED DATE: 15/04/2005  
ACCEPT DATE: ~~20~~/05/05  
27

↑  
FAST-TRACK OR PRIORITY  
STAMP HERE

LETTER/ARTICLE/REVIEW/PROGRESS Letter  
If Review or Progress, was it commissioned?

PUBLISH WITH:

COLOUR FIGURES? Yes  
If so, has letter been sent? Yes  
Is reply on file? Yes

COVER PICTURE? No

ELECTRONIC ARTWORK HERE?

TEXT AS A WORD FILE? Yes

COMPETING INTERESTS? No  
Has letter been returned?

SUPPLEMENTARY INFORMATION? Yes  
If so, figure(s)/table(s)/text? Text and figures  
In electronic form? Yes

~~ACCESSION NUMBER(S) NEEDED?~~ No  
If so, are they given?

~~STRUCTURE DATA IN TABLE FORM?~~  
If so, have *Nature* standard tables been used?

DO THE FIGURES CONTAIN ERROR BARS?  
If so, are they defined in figure legends?

NOTES FOR SUBS:

APPROVED BY SUBS: No. Please supply titles for papers in reference list.

N&V WORTHY? NO OK to accept when we've got them. Trx DP 27/5  
author suggestions:

PRESS RELEASABILITY? YES. ( I'm afraid I have no  
— can/will the press pick up on this?— control over this ... )

Please use version of text  
on floppy disk
